# Supplementary material for: Genomic hotspots of chromosome rearrangements explain conserved synteny despite high rates of chromosome evolution in a holocentric lineage
Source: PubMed Central journal article supplement (PMC11628656; doi:10.1111/mec.17086), 2023-07-24

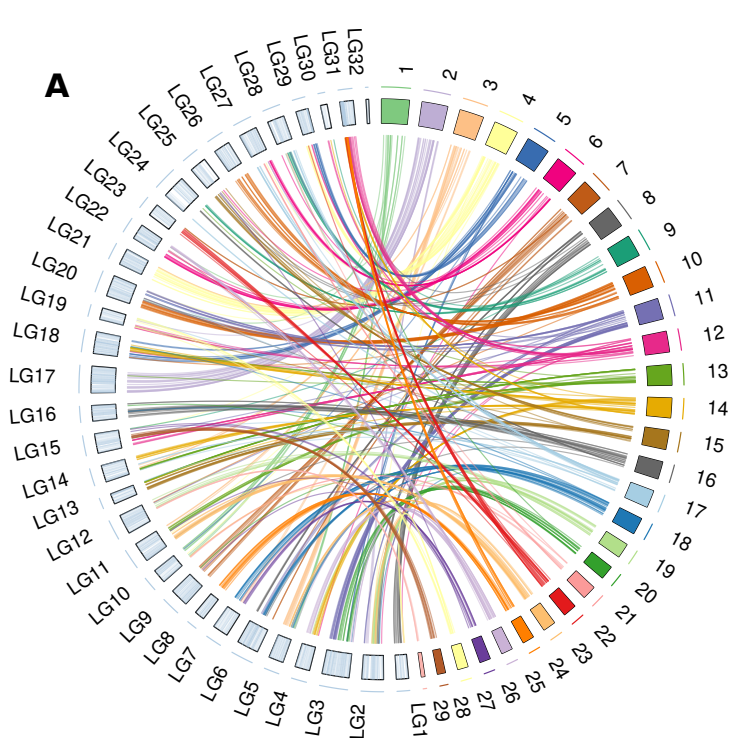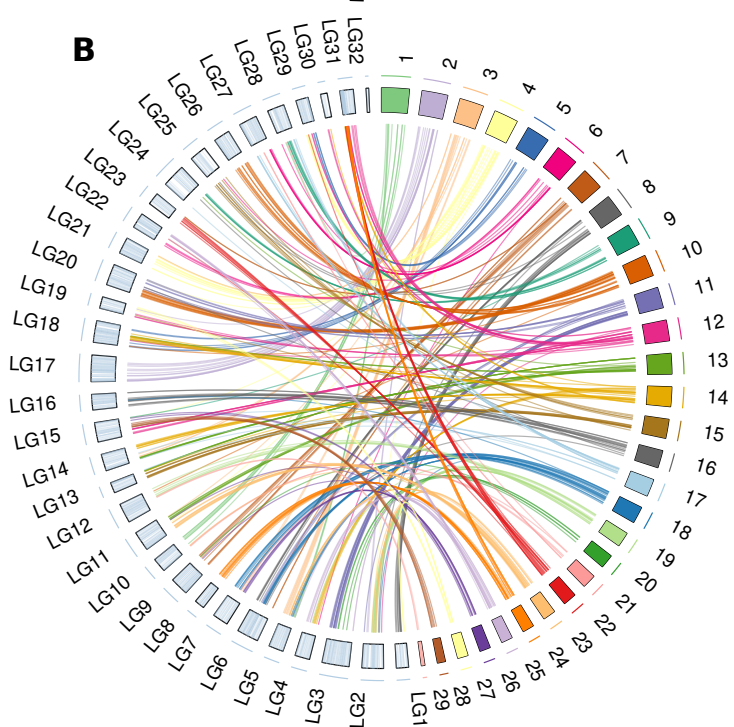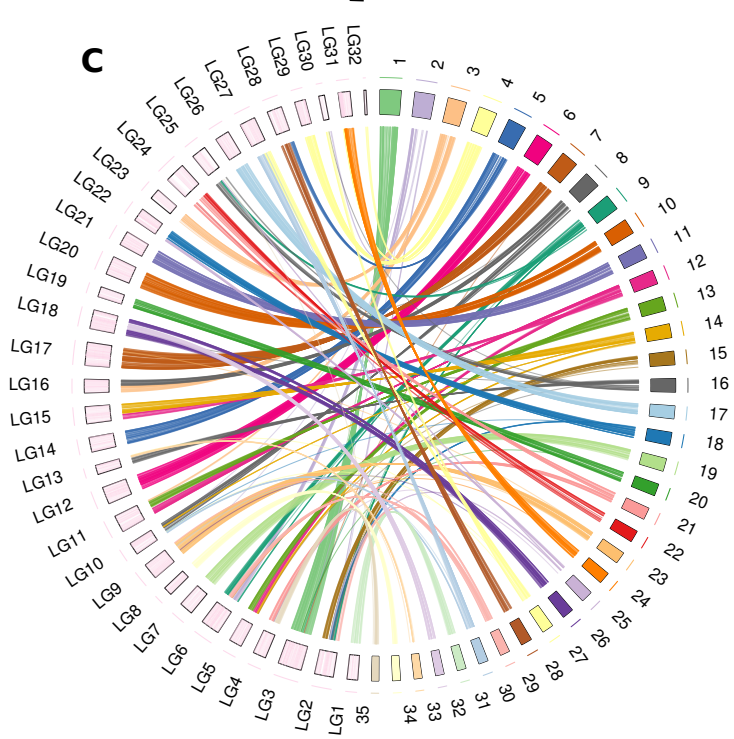

Supplement: MEC-33-e17086-s008.pdf [file MEC-33-e17086-s008.pdf]
